CORRECTION

# Correction: The Pharmacodynamics of the p53-Mdm2 Targeting Drug Nutlin: The Role of Gene-Switching Noise

The *PLOS Computational Biology* Staff

There is an error in the funding statement of this paper. KP received a grant from the Polish National Center for Science (decision number: DEC-2012/05/D/ST7/02072), and the sentence 'No funds were given to KP for publication fees' should not be included.

## Reference

1. Puszynski K, Gandolfi A, d'Onofrio A (2014) The Pharmacodynamics of the p53-Mdm2 Targeting Drug Nutlin: The Role of Gene-Switching Noise. *PLoS Comput Biol* 10(12): e1003991. doi:[10.1371/journal.pcbi.1003991](https://doi.org/10.1371/journal.pcbi.1003991) PMID: [25504419](https://pubmed.ncbi.nlm.nih.gov/25504419/)

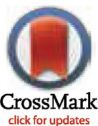

## OPEN ACCESS

**Citation:** The *PLOS Computational Biology* Staff (2015) Correction: The Pharmacodynamics of the p53-Mdm2 Targeting Drug Nutlin: The Role of Gene-Switching Noise. *PLoS Comput Biol* 11(3): e1004215. doi:[10.1371/journal.pcbi.1004215](https://doi.org/10.1371/journal.pcbi.1004215)

**Published:** March 17, 2015

**Copyright:** © 2015 The PLOS Computational Biology Staff. This is an open access article distributed under the terms of the [Creative Commons Attribution License](https://creativecommons.org/licenses/by/4.0/), which permits unrestricted use, distribution, and reproduction in any medium, provided the original author and source are credited.
